# Supplementary material for: Synthesis and proton-conductive behaviour of two MOFs with covalently bonded imidazoles in the channels
Source: Royal Society of Chemistry journal article supplement (doi:10.1039/d3dt04338j), 2024-01-01
Supplement: d3dt04338j1.pdf [file d3dt04338j1.pdf]

**Table S1.** Crystallographic data and structural refinement for **Gd-MOF**

|                                                 |                                                                  |
|-------------------------------------------------|------------------------------------------------------------------|
| Compound                                        | Gd-MOF                                                           |
| Chemical Formula                                | C <sub>25</sub> H <sub>21</sub> GdN <sub>6</sub> O <sub>10</sub> |
| Formula Weight (g/mol)                          | 722.73                                                           |
| Temperature (K)                                 | 113.15                                                           |
| Wavelength (Å)                                  | 0.71073                                                          |
| Crystal System                                  | Tetragonal                                                       |
| Space Group                                     | <i>P4<sub>1</sub>4<sub>1</sub>2</i>                              |
| <i>a</i> (Å)                                    | 8.9056(13)                                                       |
| <i>b</i> (Å)                                    | 8.9056(13)                                                       |
| <i>c</i> (Å)                                    | 33.485(7)                                                        |
| $\alpha$ (°)                                    | 90                                                               |
| $\beta$ (°)                                     | 90                                                               |
| $\gamma$ (°)                                    | 90                                                               |
| <i>Z</i>                                        | 4                                                                |
| <i>V</i> (Å <sup>3</sup> )                      | 2655.7(9)                                                        |
| Density (g/cm <sup>3</sup> )                    | 1.808                                                            |
| $\mu$ (mm <sup>-1</sup> )                       | 2.567                                                            |
| <i>F</i> (000)                                  | 1428                                                             |
| Theta (°) Range for Data Coll.                  | 2.2870 to 27.8944                                                |
| Reflections Collected                           | 22667                                                            |
| Independent Reflections                         | 3153                                                             |
| Reflections with $I > 2\sigma(I)$               | 2921                                                             |
| $R_{int}$                                       | 0.0593                                                           |
| No. of Parameters refined                       | 200                                                              |
| GOF on $F^2$                                    | 1.138                                                            |
| Final $R_1/wR_2$ ( $I > 2\sigma(I)$ )           | 0.0410/0.1150                                                    |
| $R_1/wR_2$ (all data)                           | 0.0435/0.1172                                                    |
| Largest diff. peak and hole (eÅ <sup>-3</sup> ) | 0.730/-1.531                                                     |

**Table S2.** Selected bond lengths (Å) for **Gd-MOF**.

| Bond                | Length/ Å | Bond   | Length/ Å |
|---------------------|-----------|--------|-----------|
| Gd1-O1              | 2.417(6)  | O3-C8  | 1.264(9)  |
| Gd1-O1 <sup>1</sup> | 2.417(6)  | O4-C8  | 1.267(9)  |
| Gd1-O2 <sup>1</sup> | 2.482(6)  | O5-C13 | 1.270(12) |
| Gd1-O2              | 2.482(6)  | O6-C13 | 1.319(13) |
| Gd1-O3 <sup>2</sup> | 2.447(5)  | N1-C5  | 1.399(10) |
| Gd1-O3 <sup>3</sup> | 2.447(5)  | N1-C9  | 1.427(11) |
| Gd1-O4 <sup>2</sup> | 2.517(6)  | N2-C10 | 1.395(12) |

|                     |           |        |           |
|---------------------|-----------|--------|-----------|
| Gd1-O4 <sup>3</sup> | 2.517(6)  | N2-C12 | 1.298(13) |
| Gd1-O5              | 2.376(9)  | N3-C11 | 1.358(14) |
| O1-C7               | 1.273(10) | N3-C12 | 1.357(14) |
| O2-C7               | 1.277(10) |        |           |

Symmetry codes: <sup>1</sup>1+Y,-1+X,1-Z; <sup>2</sup>1/2+X,-1/2-Y,3/4-Z; <sup>3</sup>1/2-Y,-1/2+X,1/4+Z

**Table S3** Reports for the proton conductivity properties of some UiO-66 derivatives.

| Species                                | $\sigma$ (S cm <sup>-1</sup> ) | T (°C) and RH%                        | Reference |
|----------------------------------------|--------------------------------|---------------------------------------|-----------|
| Zr-MOF                                 | $1.81 \times 10^{-2}$          | 353 K and 98% RH                      | This work |
| UiO-66(SO <sub>3</sub> H) <sub>2</sub> | $8.4 \times 10^{-2}$           | 80°C and 90% relative humidity,       | S1        |
| imidazole@UiO-67                       | $1.44 \times 10^{-3}$          | 120 °C under anhydrous conditions     | S2        |
| DT-UiO-66                              | $4.47 \times 10^{-3}$          | 373 K and 100% relative humidity (RH) | S3        |
| 60-UiO-66-1.8                          | $3 \times 10^{-2}$             | 100°C and under 98% relative humidity | S4        |
| PSM 1                                  | $1.64 \times 10^{-1}$          | 80 °C                                 | S5        |
| PSM 2                                  | $4.66 \times 10^{-3}$          | 80 °C                                 | S5        |
| UiO-66-SO <sub>3</sub> H               | $0.34 \times 10^{-2}$          | 303 K and ~97% relative humidity      | S6        |
| UiO-66-2COOH                           | $0.10 \times 10^{-2}$          | 303 K and ~97% relative humidity      | S6        |

## References

- S1. W. J. Phang, H. Jo, W. R. Lee, J. H. Song, K. Yoo, B. Kim and C. S. Hong, *Angew. Chem. Int. Ed.*, 2015, **54**, 5142–5146.
- S2. S. Liu, Z. Yue and Y. Liu, *Dalton Trans.*, 2015, **44**, 12976–12980.
- S3. L. Feng, J. Lan, F. Chen, H. Hou and H. Zhou, *Dalton Trans.*, 2021, **50**, 5943–5950.
- S4. Q.-Q. Liu, S.-S. Liu, X.-F. Liu, X.-J. Xu, X.-Y. Dong, H.-J. Zhang and S.-Q. Zang, *Inorg. Chem.*, 2022, **61**, 3406-3411.
- S5. S. Mukhopadhyay, J. Debgupta, C. Singh, R. Sarkar, O. Basu and S. K. Das, *ACS Appl. Mater. Interfaces* 2019, **11**, 13423-13432.
- S6. F. Yang, H. Huang, X. Wang, F. Li, Y. Gong, C. Zhong and J.-R. Li, *Cryst. Growth Des.*, 2015, **15**, 5827-5833.

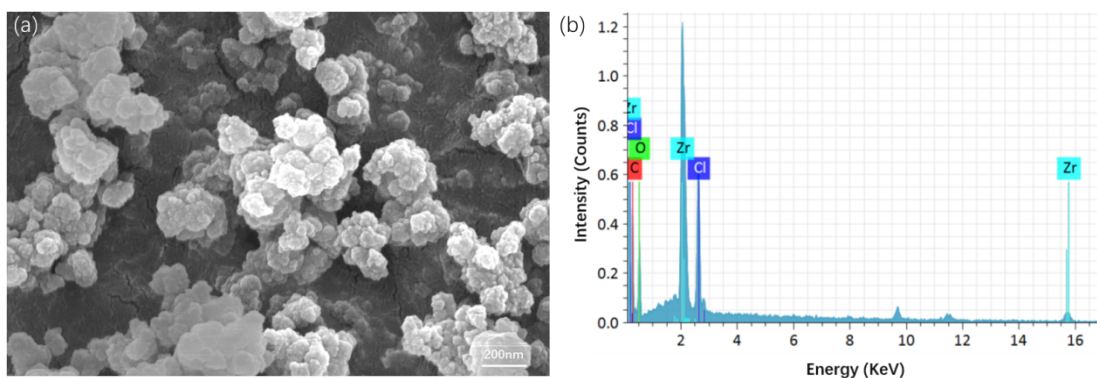

**Fig. S1.** (a) FE-SEM images of Zr-MOF. (b) The EDS peaks for Zr-MOF.

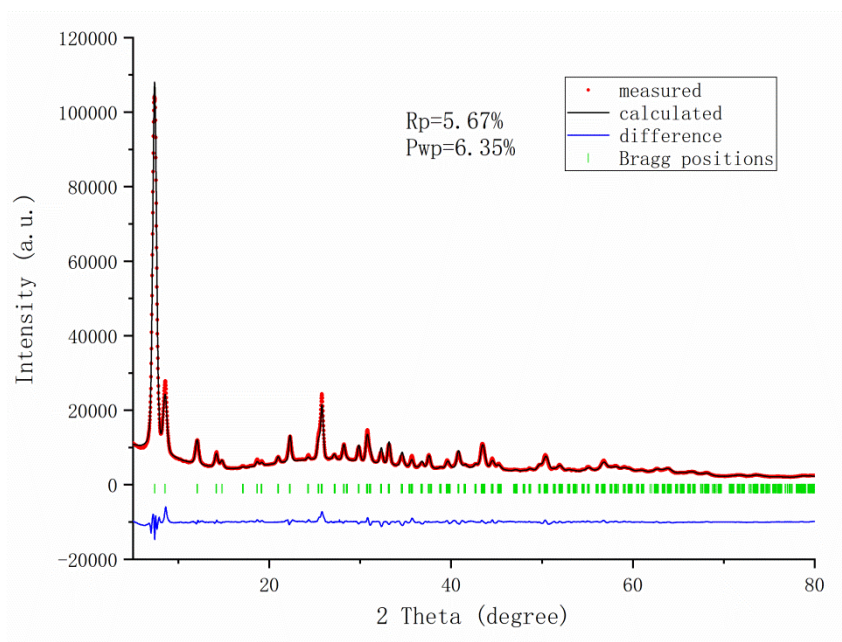

**Fig. S2.** Rietveld plot of Zr-MOF. Red: experimental points; black: calculated points; green: Bragg peaks; blue: difference pattern.

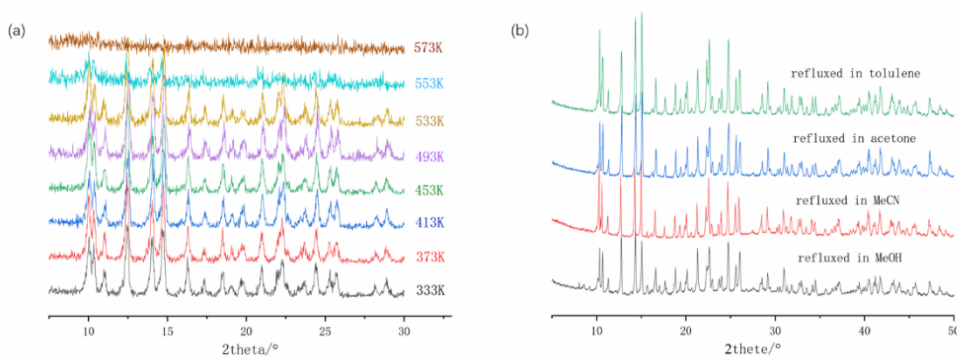

**Fig. S3.** (a) Temperature dependent XRD patterns of Gd-MOF from 333 K to 573 K. (b) PXRD patterns of the as-prepared Gd-MOF after refluxing in different solvents for 2 days.

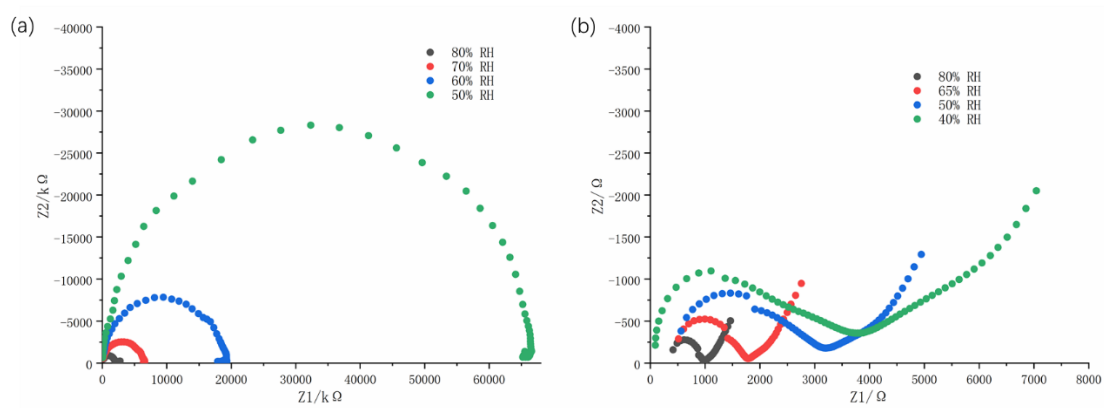

**Fig. S4.** (a) Nyquist plots of Gd-MOF at different relative humidity and 303 K. (b) Nyquist plots of Zr-MOF at different relative humidity and 303 K.

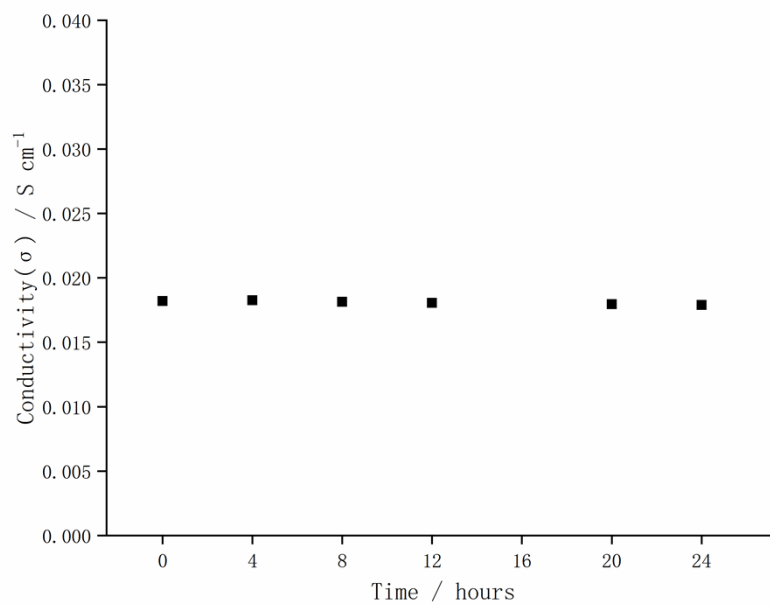

**Fig. S5.** Time-dependent proton conductivities of Zr-MOF at 353 K and 98% RH.
